# Supplementary material
Source: publisher figshare collection journal article supplement (https://karger.figshare.com/ndownloader/files/12843668)
Supplement: Supplementary file 1 [file 12843668]

Supplementary Table. 1. Statistical data of histological analysis of staining markers in control, D-galactose, and gintonin (50 mg/kg or 100 mg/kg)-fed D-gal groups. The table includes mean, standard error of mean (SEM), *p* value, and degree of freedom. *p*-values shown in the table are obtained from post-hoc analysis using Bonferroni’s multiple comparison test (n = 5 per group).

| **Immunostain marker** |  | **Control** | **D-gal** | **D-gal-GT50** | **D-gal-GT100** |
| --- | --- | --- | --- | --- | --- |
| **Ki67+ nuclei** | **Mean** | 19 | 7.1 | 10.4 | 15.6 |
| **SEM** | 1.422 | 0.674 | 3.134 | 1.343 |
| ***p* value** | **Control vs** | *P* < 0.001 | *P* < 0.001 | *P* > 0.05 |
|  |  | **D-gal vs** | *P* > 0.05 | *P* < 0.001 |
| **Degree of freedom** | F (3,36) = 21.36 |  | **D-gal-GT50 vs** | *P* < 0.01 |
| **DCX+ cells** | **Mean** | 109.4 | 64.5 | 85.8 | 102.8 |
| **SEM** | 6.501 | 2.517 | 3.693 | 5.561 |
| ***p* value** | **Control vs** | *P* < 0.001 | *P* < 0.01 | *P* > 0.05 |
|  |  | **D-gal vs** | *P* < 0.05 | *P* < 0.001 |
| **Degree of freedom** | F (3,36) = 17.26 |  | **D-gal-GT50 vs** | *P* > 0.05 |
| **BrdU+ cells** | **Mean** | 10.09 | 3.54 | 6.09 | 8.27 |
| **SEM** | 0.928 | 0.542 | 0.517 | 1.306 |
| ***p* value** | **Control vs** | *P* < 0.001 | *P* < 0.01 | *P* > 0.05 |
|  |  | **D-gal vs** | *P* > 0.05 | *P* < 0.01 |
| **Degree of freedom** | F (3,40) = 12.16 |  | **D-gal-GT50 vs** | *P* > 0.05 |
| **BrdU+-NeuN+ cells** | **Mean** | 5.45 | 1.63 | 3.18 | 4.27 |
| **SEM** | 0.845 | 0.26 | 0.3 | 0.757 |
| ***p* value** | **Control vs** | *P* < 0.001 | *P* < 0.05 | *P* > 0.05 |
|  |  | **D-gal vs** | *P* > 0.05 | *P* < 0.05 |
| **Degree of freedom** | F (3,40) = 8.596 |  | **D-gal-GT50 vs** | *P* > 0.05 |
| **Percentage of BrdU+-NeuN+ cells/BrdU+ cells** | **Mean** | 52.34 | 49.84 | 52.96 | 51.19 |
| **SEM** | 6.923 | 11.073 | 7.824 | 5.905 |
| ***p* value** | **Control vs** | *P* > 0.05 | *P* > 0.05 | *P* > 0.05 |
|  |  | **D-gal vs** | *P* > 0.05 | *P* > 0.05 |
| **Degree of freedom** | F (3,40) = 0.1124 |  | **D-gal-GT50 vs** | *P* > 0.05 |
| **pCREB+ nuclei** | **Mean** | 20.1 | 9.7 | 15 | 19.5 |
| **SEM** | 1.53 | 1.38 | 0.94 | 1.24 |
| ***p* value** | **Control vs** | *P* < 0.001 | *P* > 0.05 | *P* > 0.05 |
|  |  | **D-gal vs** | *P* < 0.05 | *P* < 0.001 |
| **Degree of freedom** | F (3,36) = 13.91 |  | **D-gal-GT50 vs** | *P* > 0.05 |

Supplementary Table. 2. Statistical data of immunoblot analysis in control, D-galactose, gintonin (50 mg/kg or 100 mg/kg)-fed D-gal, and gintonin (100 mg/kg) groups. The table includes relative optic density (ROD), standard error of mean (SEM), p value, and degree of freedom. p-values shown in the table are obtained from post-hoc analysis using Bonferroni’s multiple comparison test (n = 5 per group).

| **Immunoblot marker** |  | **Control** | **D-gal** | **D-gal-GT50** | **D-gal-GT100** | **GT100** |
| --- | --- | --- | --- | --- | --- | --- |
| **DCX** | **ROD** | 100 | 58.43. | 72.03 | 88.27 | 99.9 |
| **SEM** | 4.064 | 3.763 | 3.613 | 3.392 | 5.65 |
| ***p* value** | **Control vs.** | *P* < 0.001 | *P* < 0.001 | *P* > 0.05 | *P* > 0.05 |
|  |  | **D-gal vs.** | *P* > 0.05 | *P* < 0.001 | *P* < 0.001 |
|  |  |  | **D-gal-GT50 vs.** | *P* > 0.05 | *P* < 0.001 |
| **Degree of freedom** | F (4,45) = 18.98 |  |  | **D-gal-GT100 vs.** | *P* > 0.05 |
| **LPA1 receptor** | **ROD** | 100 | 67.66 | 76.89 | 87.13 | 97.58 |
| **SEM** | 5.162 | 3.903 | 4.116 | 3.307 | 3.974 |
| ***p* value** | **Control vs.** | *P* < 0.001 | *P* < 0.01 | *P* > 0.05 | *P* > 0.05 |
|  |  | **D-gal vs.** | *P* > 0.05 | *P* < 0.05 | *P* < 0.001 |
|  |  |  | **D-gal-GT50 vs.** | *P* > 0.05 | *P* < 0.01 |
| **Degree of freedom** | F (4,45) = 10.96 |  |  | **D-gal-GT100 vs.** | *P* > 0.05 |
